# Supplementary material
Source: PubMed Central journal article supplement (PMC3968322)
Supplement: NIHMS557045-supplement-Supplementary_Information.pdf [file NIHMS557045-supplement-Supplementary_Information.pdf]

## Supplementary Data

---

# Decreased Level of Olfactory Receptors in Blood Cells Following Traumatic Brain Injury and Potential Association with Tauopathy

Wei Zhao<sup>a,1</sup>, Lap Ho<sup>a,1</sup>, Merina Varghese<sup>a</sup>, Shrishailam Yemul<sup>a,d</sup>, Kristen Dams-O'Connor<sup>b</sup>, Wayne Gordon<sup>b</sup>, Lindsay Knable<sup>a</sup>, Daniel Freire<sup>a</sup>, Vahram Haroutunian<sup>c</sup> and Giulio Maria Pasinetti<sup>a,c,d,\*</sup>

<sup>a</sup>*Department of Neurology, Mount Sinai School of Medicine, New York, NY, USA*

<sup>b</sup>*Department of Rehabilitation, Mount Sinai School of Medicine, New York, NY, USA*

<sup>c</sup>*Department of Psychiatry, Mount Sinai School of Medicine, New York, NY, USA*

<sup>d</sup>*GRECC, James J. Peters Veterans Affairs Medical Center, Bronx, NY, USA*

Accepted 8 November 2012

---

<sup>1</sup>These authors contributed equally to this study.

\*Correspondence to: Giulio Maria Pasinetti, M.D., Ph.D., Department of Neurology, Mount Sinai School of Medicine, 1468 Madison Avenue, Annenberg Building, Room 20-02, New York, NY 10029, USA. Tel.: +1 212 241 7938 or +1 212 241 5563; Fax: +1 212 876 9042; E-mail: Giulio.Pasinetti@mssm.edu.

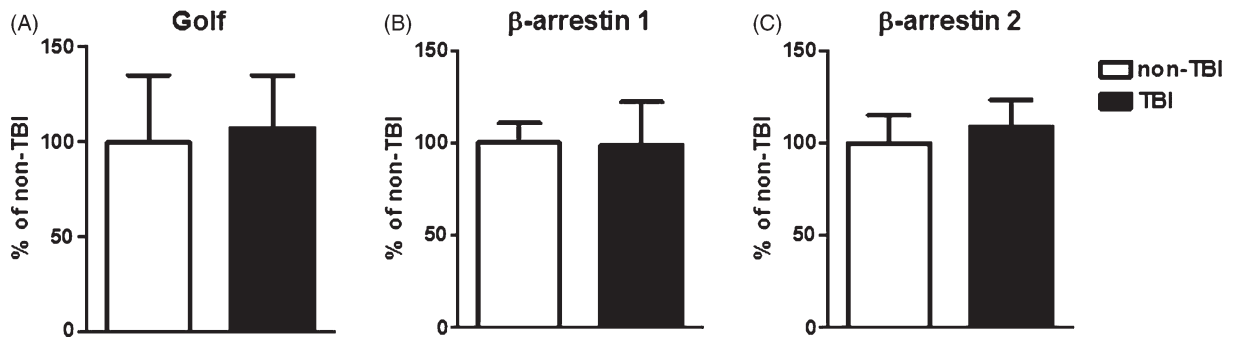

Supplementary Figure 1. Golf and arrestin levels remain unchanged in traumatic brain injury (TBI) subjects. The mRNA contents for (A) Golf, (B)  $\beta$ -arrestin 1, and (C)  $\beta$ -arrestin 2 in TBI and control cases from a veteran study cohort were analyzed by qPCR. Bar graphs represent mean + SEM. \* $p < 0.05$  by student *t*-test, TBI versus control.

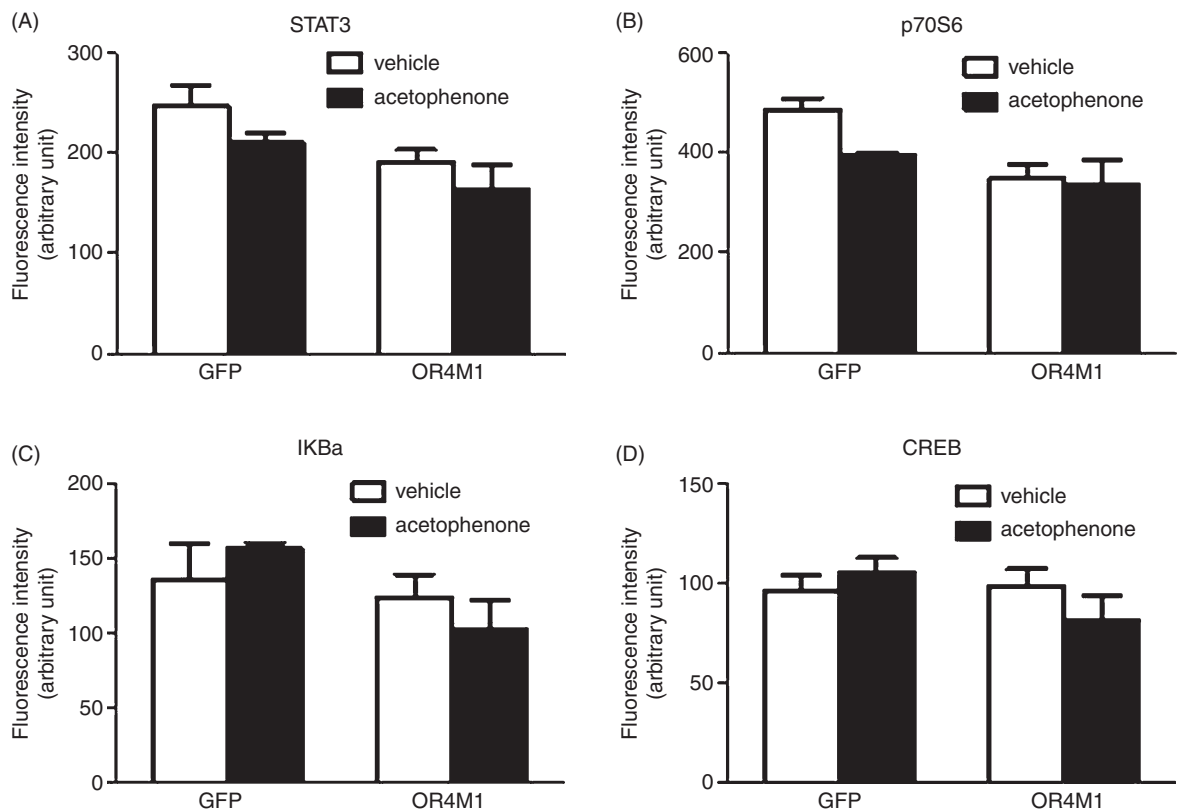

Supplementary Figure 2. Activation of OR4M1 and downstream signaling pathways. Primary cortico-hippocampal neuron culture was transduced with lentiviral particles overexpressing OR4M1 or control lentiviral particles by spin infection ( $250\text{ g} \times 90\text{ min}$  at  $30^\circ\text{C}$ ). Transduced neurons were treated with acetophenone for 1 h, and multiplex luminex assay was performed using the Milliplex xMAP 8-plex multipathway signaling-phosphoprotein kin (Millipore) according to manufacturer's protocol. No changes of (A) STAT3 phosphorylation on Ser 727, (B) p70 S6 kinase phosphorylation on Thr412, (C) IKBa phosphorylation on Ser32, and (D) CREB phosphorylation on Ser133 was detected.
